# Supplementary material for: Biliatresone induces cholangiopathy in C57BL/6J neonates
Source: PubMed Central journal article supplement (PMC10310722; doi:10.1038/s41598-023-37354-z), 2023-06-29
Supplement: 41598_2023_37354_MOESM1_ESM.pdf [file 41598_2023_37354_MOESM1_ESM.pdf]

Supplementary Figure 1  
 Overview pedigree of the animal numbers used

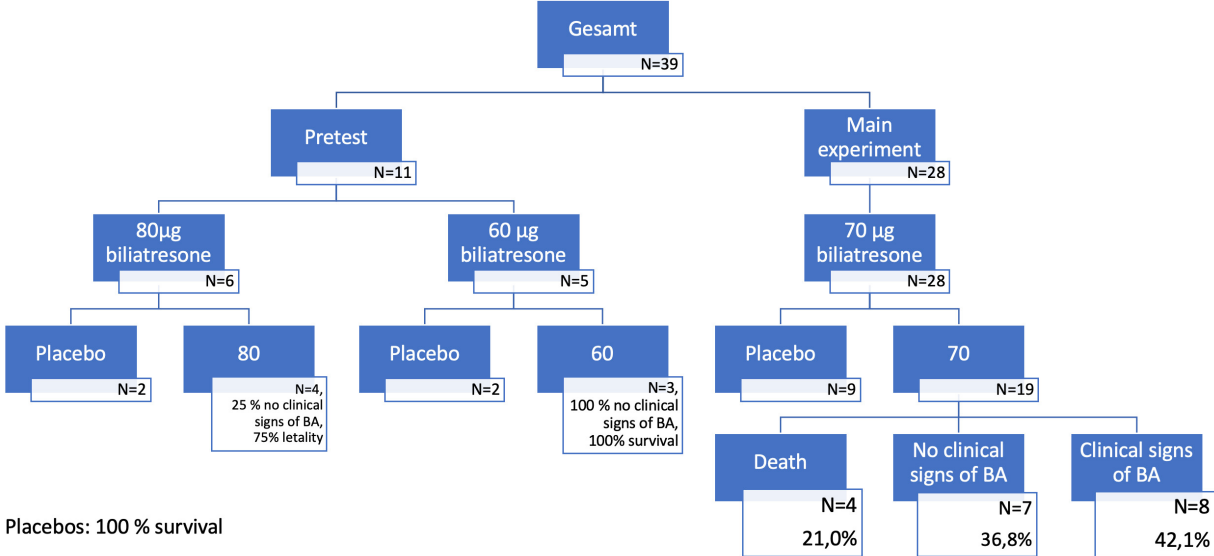

Placebos: 100 % survival
